# Supplementary material
Source: publisher site journal article supplement (https://static.cambridge.org/content/id/urn:cambridge.org:id:article:S1092852920001522/resource/name/S1092852920001522supp001.docx)
Supplement: Supplementary file 1 [file S1092852920001522supp001.docx]

**Table (Appendix).** Comparison of Isobe and Finnegan scores

| Signs and symptoms | Isobe score | Finnegan score |
| --- | --- | --- |
| Central nervous system disturbances | |  |
| Crying: excessive high pitched | 3 | 2 |
| Crying: continuous high pitched | 3 | 3 |
| Sleeps <1 hour after feeding | 3 | 3 |
| Sleeps <2 hours after feeding | 3 | 2 |
| Sleeps <3 hours after feeding | 3 | 1 |
| Hyperactive Moro reflex | 3 | 2 |
| Markedly hyperactive Moro reflex | 3 | 3 |
| Mild tremors: disturbed | 2 | 1 |
| Moderate-severe tremors: disturbed | 2 | 2 |
| Mild tremors: undisturbed | 3 | 3 |
| Moderate-severe tremors: undisturbed | 3 | 4 |
| Increased muscle tone | 1 | 2 |
| Decreased muscle tone | 1 | N/A |
| Excoriation (specific area) | 1 | 1 |
| Generalized seizure | 5 | 5 |
| Lethargy | 1 | N/A |
| Metabolic, vasomotor, and respiratory disturbance | | |
| Sweating | 1 | 1 |
| Fever <101°F (37.2–38.3°C) | 1 | 1 |
| Fever >101°F (38.4°C) | 1 | 2 |
| Frequent yawning (>3) | 1 | 1 |
| Mottling | 1 | 1 |
| Nasal stuffiness | N/A | 1 |
| Sneezing (>3) | N/A | 1 |
| Nasal flaring | N/A | 2 |
| Respiratory rate (>60/min) | 1 | 1 |
| Respiratory rate (>60/min with retractions) | 1 | 2 |
| Apnoea | 5 | N/A |
| Gastrointestinal disturbances | |  |
| Excessive sucking | N/A | 1 |
| Poor feeding | 2 | 2 |
| Regurgitation | 2 | 2 |
| Projectile vomiting | 2 | 3 |
| Loose stools | 2 | 2 |
| Watery stools | 2 | 3 |

N/A: not applicable
